# Supplementary material
Source: HighWire-hosted journal article supplement (https://jnm.snmjournals.org/highwire/filestream/94110/field_highwire_adjunct_files/0/jnm078154_Suppl_information.pdf)
Supplement: jnm078154_Suppl_information.pdf [file jnm078154_Suppl_information.pdf]

## Supplemental methods:

### Oligonucleotides used for real-time PCR.

The primers and probes used to amplify the mCherry transgene are the following: forward primer, 5'-GACCACCTACAAGGCCAAGAAG-3', reverse primer, 5'-AGGTGATGTCCAACCTTGATGTTGA-3', TaqMan probe, 5'-6-carboxy-fluorescein-CAGCTGCCCCGGCGCCTACA-6-carboxy-tetramethylrhodamine[TAMRA]-3'). As an internal control for total number of cells present in the tissue sample, a sequence of the murine vimentin gene was amplified (forward primer, 5'-AGCTGCTAACTACCAGGACACTATTG-3'; reverse primer, 5'-CGAAGGTGACGAGCCATCTC-3', TaqMan probe, 5'-VIC-CCTTCATGTTTTGGATCTCATCCTGCAGG-TAMRA-3)').
